# Supplementary material for: Midline crossing by gustatory receptor neuron axons is regulated byfruitless, doublesexand the Roundabout receptors
Source: Oxford University Press journal article supplement (doi:10.1242/dev.045047), 2009-12-29
Supplement: dev045047ttables2.pdf [file dev045047ttables2.pdf]

**Table S2. Immunohistochemistry in genotypes containing *fru*<sup>P1.LexA</sup>**

| Genotype                                                          | % with detectable Fru <sup>M</sup> in CNS | % with detectable 5HT in neurons innervating internal genitalia |
|-------------------------------------------------------------------|-------------------------------------------|-----------------------------------------------------------------|
| <i>XY; fru</i> <sup>P1.LexA</sup> / <i>+</i>                      | 100 (6)                                   | 100 (6)                                                         |
| <i>XX; fru</i> <sup>P1.LexA</sup> / <i>+</i>                      | 0 (6)                                     | 0 (10)                                                          |
| <i>XY; fru</i> <sup>P1.LexA</sup> / <i>fru</i> <sup>P1.LexA</sup> | 0 (10)                                    | 0 (12)                                                          |
| <i>XY; fru</i> <sup>P1.LexA</sup> / <i>fru</i> <sup>4-40</sup>    | 0 (10)                                    | 0 (10)                                                          |
| <i>XY; fru</i> <sup>P1.LexA</sup> / <i>fru</i> <sup>sat15</sup>   | 0 (10)                                    | 0 (10)                                                          |
