# Supplementary figures and images for: Midline crossing by gustatory receptor neuron axons is regulated byfruitless, doublesexand the Roundabout receptors
Source: Oxford University Press journal article supplement (doi:10.1242/dev.045047), 2009-12-29

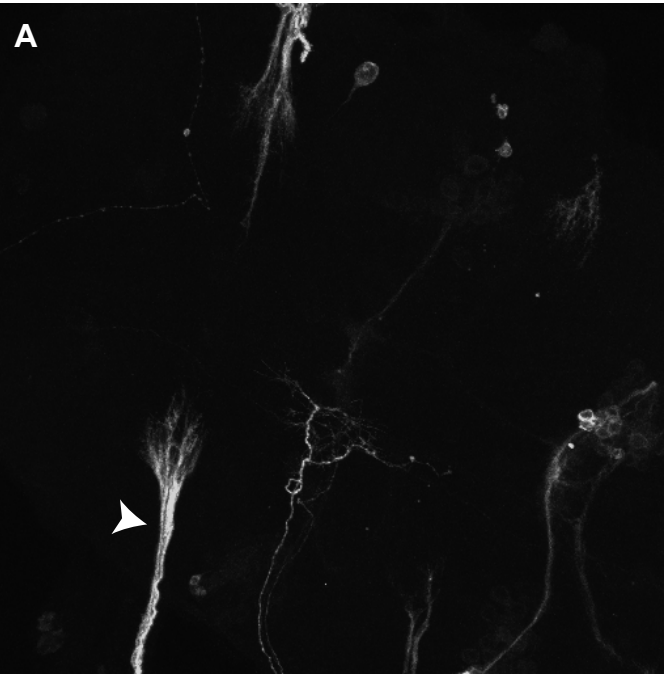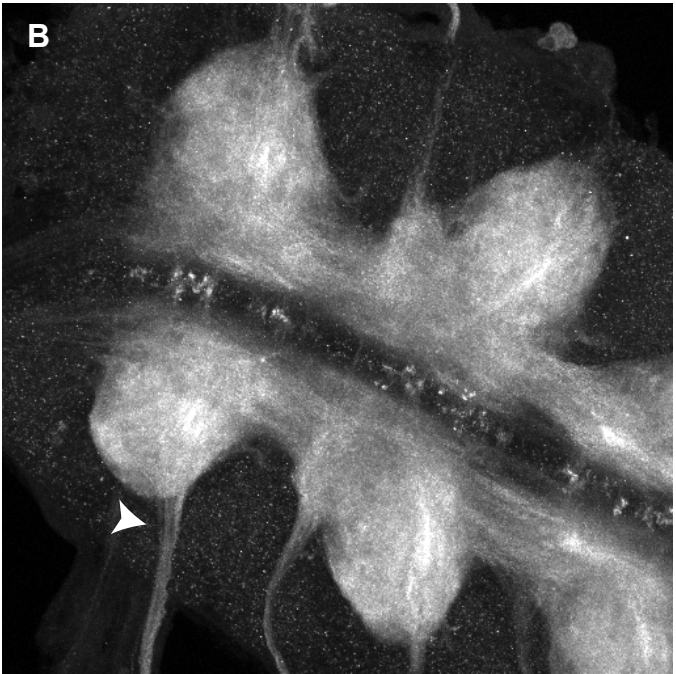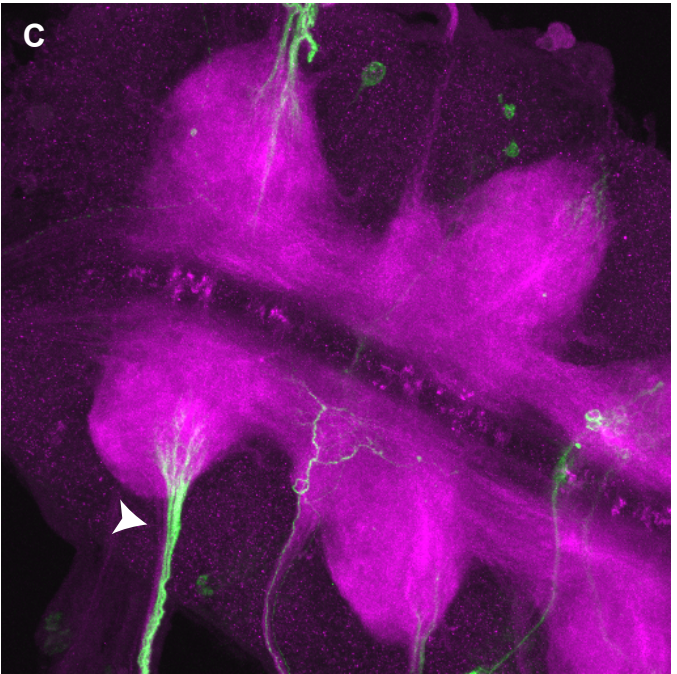

Supplement: dev045047-sup-045047-figs2.pdf [file dev045047-sup-045047-figs2.pdf]

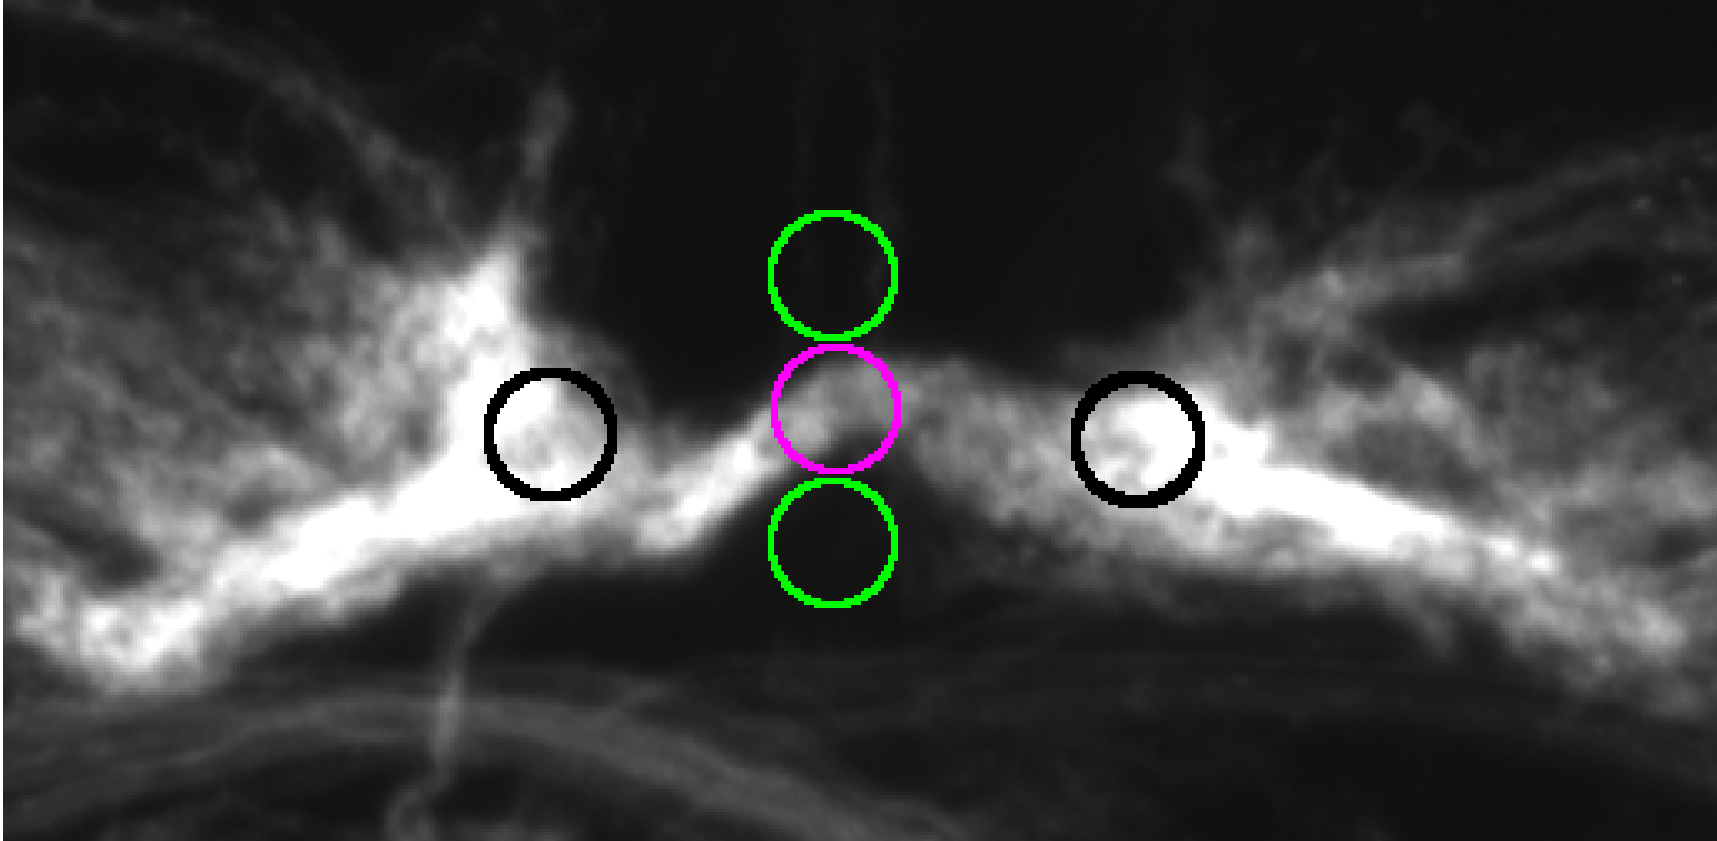

Supplement: dev045047-sup-045047-figs3.pdf [file dev045047-sup-045047-figs3.pdf]
